# Supplementary material
Source: PubMed Central journal article supplement (PMC7960294)
Supplement: 15-00947.pdf [file 15-00947.pdf]

**On-line Table: Demographics, CCI measurements, interpretation of CT using proposed CCI cutoffs, imaging findings, and clinical information**

| ID | Age (yr)/Sex | Left Sag Avg CCI (mm) |                                 | Right Sag Avg CCI (mm)         |                                 | Left Cor Avg CCI (mm) |                               | Right Cor Avg CCI (mm)                   |                                              | Initial CT Findings of Atlanto-Occipital Injury |                                                  | Follow-Up MRI/CT Findings                           | Mechanism of Injury         | Clinical Signs/Symptoms at Presentation | Treatment        |
|----|--------------|-----------------------|---------------------------------|--------------------------------|---------------------------------|-----------------------|-------------------------------|------------------------------------------|----------------------------------------------|-------------------------------------------------|--------------------------------------------------|-----------------------------------------------------|-----------------------------|-----------------------------------------|------------------|
|    |              | Avg CCI (mm)          | Right Avg CCI (mm) <sup>a</sup> | Left Avg CCI (mm) <sup>a</sup> | Right Avg CCI (mm) <sup>a</sup> | Avg CCI (mm)          | Revised CCI (mm) <sup>b</sup> | Pang et al <sup>2</sup> Avg CCI (4.0 mm) | Gire et al <sup>3</sup> Revised CCI (2.5 mm) | 3 SDs above Age-Specific Mean                   | 2 SDs above Age-Specific Mean                    |                                                     |                             |                                         |                  |
| 1  | 1/M          | 4.8                   | 3.9                             | 4.7                            | 4.8                             | 4.0                   | 5.1                           | Positive                                 | Positive                                     | Positive                                        | OC-C1 and C1-C2 widening                         | MRI: TM disruption                                  | MVA                         | Resp insuff, SCI, quadriplegia          | Fusion           |
| 2  | 3/M          | 2.3                   | 2.9                             | 1.8                            | 2.1                             | 2.4                   | 3.1                           | Negative                                 | Negative                                     | Negative                                        | None                                             | MRI: TM disruption                                  | Hit by car                  | Resp insuff, quadriplegia               | Fusion           |
| 3  | 7/F          | 2.0                   | 2.6                             | 2.6                            | 2.3                             | 2.5                   | 3.7                           | Negative                                 | Negative                                     | Negative                                        | REH                                              | MRI: TM lifted off clivus                           | MVA                         | Resp insuff, triplegia                  | Fusion           |
| 4  | 3/M          | 1.9                   | 2.5                             | 2.0                            | 2.0                             | 2.3                   | 3.3                           | Negative                                 | Negative                                     | Negative                                        | None                                             | MRI: TM lifted off odontoid                         | MVA                         | Resp insuff, SCI, paraplegia            | Fusion           |
| 5  | 6/F          | 1.9                   | 2.7                             | 2.4                            | 2.2                             | 2.7                   | 4.1                           | Negative                                 | Negative                                     | Negative                                        | Retro-odontoid hematoma                          | MRI: TM disruption                                  | MVA                         | Resp insuff, hemiplegia                 | Fusion           |
| 6  | 13/M         | 3.3                   | 3.2                             | 4.0                            | 3.7                             | 4.0                   | 4.9                           | Negative                                 | Positive                                     | Positive                                        | Perimedullary SAH                                | MRI: TM disruption                                  | MVA                         | Resp insuff, neck pain                  | Fusion           |
| 7  | 4/F          | 2.1                   | 2.3                             | 2.6                            | 2.4                             | 2.7                   | 3.0                           | Negative                                 | Negative                                     | Negative                                        | REH                                              | MRI: TM lifted off clivus                           | MVA                         | Neck pain                               | Conservative     |
| 8  | 10/M         | 3.3                   | 2.9                             | 3.7                            | 3.5                             | 2.6                   | 4.2                           | Negative                                 | Positive                                     | Positive                                        | REH                                              | MRI: TM lifted off clivus                           | MVA                         | Resp insuff, TBI, hemiparesis           | Conservative     |
| 9  | 10/M         | 2.2                   | 2.3                             | 2.6                            | 2.4                             | 2.4                   | 3.1                           | Negative                                 | Negative                                     | Negative                                        | REH                                              | MRI: TM lifted off clivus                           | High-speed boating accident | Neck pain                               | Conservative     |
| 10 | 9/F          | 7.1                   | 8.1                             | 6.7                            | 6.9                             | 7.7                   | 8.9                           | Positive                                 | Positive                                     | Positive                                        | Obvious OC-C1 malalignment                       | MRI: TM disruption                                  | MVA                         | Resp insuff, SCI, quadriplegia          | Fusion           |
| 11 | 3/F          | 5.7                   | 4.7                             | 5.0                            | 5.4                             | 4.9                   | 6.0                           | Positive                                 | Positive                                     | Positive                                        | OC-C1 and C1-C2 widening, perivertebral hematoma | NA                                                  | Hit by car                  | Resp insuff, quadriplegia               | Patient deceased |
| 12 | 6/M          | 3.1                   | 4.1                             | 3.2                            | 3.2                             | 4.4                   | 4.8                           | Positive                                 | Positive                                     | Positive                                        | REH                                              | CT: New calcification in TM, decreased (normal) CCI | Hit by car                  | Neck pain, myelopathy                   | Fusion           |
| 13 | 6/M          | 5.3                   | 6.2                             | 5.6                            | 5.5                             | 7.0                   | 8.2                           | Positive                                 | Positive                                     | Positive                                        | REH: OC-C1 joint space hemorrhage                | NA                                                  | MVA                         | Resp insuff                             | Patient deceased |
| 14 | 16/M         | 1.2                   | 1.1                             | 1.3                            | 1.3                             | 1.1                   | 1.5                           | Negative                                 | Negative                                     | Negative                                        | None                                             | MRI: TM disruption                                  | MVA                         | Neck pain                               | Conservative     |

**Note:**—Resp insuff indicates respiratory insufficiency; ID, identification; OC-C1, occipital condyle-C1; TBI, traumatic brain injury; Sag, sagittal; Avg, average; TM, tectorial membrane; REH, retroclival epidural hematoma; MVA, motor vehicle collision; SCI, spinal cord injury; NA, not applicable; Cor, coronal.

<sup>a</sup> Pang et al<sup>2</sup> Avg CCI.

<sup>b</sup> Gire et al<sup>3</sup> revised CCI.
